# Supplementary material for: No evidence for a relationship between breed cooperativeness and inequity aversion in dogs
Source: PLoS One. 2020 Jun 17;15(6):e0233067. doi: 10.1371/journal.pone.0233067 (PMC7299310; doi:10.1371/journal.pone.0233067)
Supplement: S1 Dataset — (XLSX) [file pone.0233067.s003.xlsx]

## Sheet: Paw Task
observation	group	subject	dyad	sex	age	breed	condition	order	completed_trials	paw_prompts_total	sit_prompts_total	stress_total	test_duration
1	cooperative	CA	1	M	7.3	border collie	ET	3	30	30	0	12	235.4
2	cooperative	CA	1	M	7.3	border collie	ET	1	30	30	0	11	249.4
3	cooperative	CA	1	M	7.3	border collie	RI	4	30	53	10	8	210.8
4	cooperative	CA	1	M	7.3	border collie	NR	2	30	37	3	7	129.2
5	cooperative	CB	2	M	4.9	Australian shepherd	ET	3	30	30	47	3	370.2
6	cooperative	CB	2	M	4.9	Australian shepherd	ET	1	30	30	3	2	270.6
7	cooperative	CB	2	M	4.9	Australian shepherd	RI	4	9	10	30	1	126.6
8	cooperative	CB	2	M	4.9	Australian shepherd	NR	2	30	39	6	7	162.8
9	cooperative	CC	3	F	3.3	Labrador retriever	ET	3	30	30	0	15	213.6
10	cooperative	CC	3	F	3.3	Labrador retriever	ET	1	11	11	12	7	160.2
11	cooperative	CC	3	F	3.3	Labrador retriever	RI	4	13	14	11	1	91.6
12	cooperative	CC	3	F	3.3	Labrador retriever	NR	2	30	34	7	1	123
13	cooperative	CD	4	M	3.6	border collie	ET	3	30	30	15	1	327.6
14	cooperative	CD	4	M	3.6	border collie	ET	1	30	30	13	0	243.6
15	cooperative	CD	4	M	3.6	border collie	RI	2	5	5	15	3	116.8
16	cooperative	CD	4	M	3.6	border collie	NR	4	30	36	5	0	120.6
17	cooperative	CE	2	M	1.5	Australian shepherd	ET	3	30	30	35	6	370.2
18	cooperative	CE	2	M	1.5	Australian shepherd	ET	1	30	31	13	8	270.6
19	cooperative	CE	2	M	1.5	Australian shepherd	RI	4	30	45	12	1	233.6
20	cooperative	CE	2	M	1.5	Australian shepherd	NR	2	30	41	15	0	170.8
21	cooperative	CF	3	F	3.1	Labrador retriever	ET	3	30	31	4	7	213.6
22	cooperative	CF	3	F	3.1	Labrador retriever	ET	1	11	12	18	8	160.2
23	cooperative	CF	3	F	3.1	Labrador retriever	RI	4	9	12	11	2	83.2
24	cooperative	CF	3	F	3.1	Labrador retriever	NR	2	29	29	17	2	146.4
25	cooperative	CG	5	M	2	border collie	ET	1	30	31	19	1	241
26	cooperative	CG	5	M	2	border collie	ET	3	30	30	8	2	198.2
27	cooperative	CG	5	M	2	border collie	RI	2	22	36	44	5	227.4
28	cooperative	CG	5	M	2	border collie	NR	4	30	30	17	1	122.6
29	cooperative	CH	6	F	2.3	rough collie	ET	3	1	1	16	4	269.2
30	cooperative	CH	6	F	2.3	rough collie	ET	1	16	22	10	15	355.4
31	cooperative	CH	6	F	2.3	rough collie	RI	2	4	16	1	1	65.8
32	cooperative	CH	6	F	2.3	rough collie	NR	4	2	2	13	1	44.8
33	cooperative	CI	5	F	9.8	Australian shepherd	ET	1	30	30	1	10	241
34	cooperative	CI	5	F	9.8	Australian shepherd	ET	3	30	30	1	22	198.2
35	cooperative	CI	5	F	9.8	Australian shepherd	RI	2	30	31	13	18	189.2
36	cooperative	CI	5	F	9.8	Australian shepherd	NR	4	30	43	12	7	146.2
37	cooperative	CJ	1	F	10.9	border collie	ET	3	30	30	2	3	235.4
38	cooperative	CJ	1	F	10.9	border collie	ET	1	30	30	2	0	249.4
39	cooperative	CJ	1	F	10.9	border collie	RI	4	30	31	6	1	166.8
40	cooperative	CJ	1	F	10.9	border collie	NR	2	30	30	7	3	118.4
41	cooperative	CK	6	F	3.3	rough collie	ET	3	30	30	27	2	269.2
42	cooperative	CK	6	F	3.3	rough collie	ET	1	30	31	21	8	355.4
43	cooperative	CK	6	F	3.3	rough collie	RI	2	7	9	13	2	121
44	cooperative	CK	6	F	3.3	rough collie	NR	4	16	20	18	1	114.8
45	cooperative	CL	7	M	3	Australian shepherd	ET	1	30	32	10	0	272
46	cooperative	CL	7	M	3	Australian shepherd	ET	3	30	30	7	5	272.8
47	cooperative	CL	7	M	3	Australian shepherd	RI	4	29	42	25	0	269.2
48	cooperative	CL	7	M	3	Australian shepherd	NR	2	30	43	1	1	138.6
49	independent	IA	8	F	5.2	shiba inu	ET	3	30	32	17	11	257.4
50	independent	IA	8	F	5.2	shiba inu	ET	1	30	30	33	20	305
51	independent	IA	8	F	5.2	shiba inu	RI	4	19	19	14	9	190.8
52	independent	IA	8	F	5.2	shiba inu	NR	2	22	22	17	5	124
53	independent	IB	8	F	3.9	shiba inu	ET	3	3	3	11	3	257.4
54	independent	IB	8	F	3.9	shiba inu	ET	1	30	30	5	5	305
55	independent	IB	8	F	3.9	shiba inu	RI	4	5	5	11	0	62.6
56	independent	IB	8	F	3.9	shiba inu	NR	2	17	17	11	20	85.6
57	independent	IC	9	M	9.8	Siberian husky	ET	1	30	30	11	9	280.4
58	independent	IC	9	M	9.8	Siberian husky	ET	3	25	32	10	0	281.4
59	independent	IC	9	M	9.8	Siberian husky	RI	4	4	4	12	5	62
60	independent	IC	9	M	9.8	Siberian husky	NR	2	17	17	10	10	90.4
61	independent	ID	10	F	5.8	Siberian husky	ET	1	30	30	20	7	256.8
62	independent	ID	10	F	5.8	Siberian husky	ET	3	30	30	17	4	219.6
63	independent	ID	10	F	5.8	Siberian husky	RI	2	21	27	38	6	216.4
64	independent	ID	10	F	5.8	Siberian husky	NR	4	30	32	24	5	147.6
65	independent	IE	11	F	8.2	shiba inu	ET	1	30	30	3	10	296.2
66	independent	IE	11	F	8.2	shiba inu	ET	3	30	31	2	1	260.2
67	independent	IE	11	F	8.2	shiba inu	RI	2	30	30	4	18	207.6
68	independent	IE	11	F	8.2	shiba inu	NR	4	30	31	24	20	179.2
69	independent	IF	12	F	2.8	shiba inu	ET	1	19	23	21	11	282.2
70	independent	IF	12	F	2.8	shiba inu	ET	3	3	14	12	6	130
71	independent	IF	12	F	2.8	shiba inu	RI	4	3	8	11	1	73.8
72	independent	IF	12	F	2.8	shiba inu	NR	2	11	12	19	0	128
73	independent	IG	9	M	11	Siberian husky	ET	1	30	30	2	1	280.4
74	independent	IG	9	M	11	Siberian husky	ET	3	26	29	10	14	281.4
75	independent	IG	9	M	11	Siberian husky	RI	4	7	19	18	3	98
76	independent	IG	9	M	11	Siberian husky	NR	2	14	26	10	3	109.4
77	independent	IH	13	F	1.1	akita inu	ET	2	30	30	37	1	355.8
78	independent	IH	13	F	1.1	akita inu	ET	4	30	31	11	5	243
79	independent	IH	13	F	1.1	akita inu	RI	1	4	4	12	4	74
80	independent	IH	13	F	1.1	akita inu	NR	3	10	13	12	5	70.4
81	independent	II	10	F	4.9	Siberian husky	ET	1	30	31	0	6	256.8
82	independent	II	10	F	4.9	Siberian husky	ET	3	30	31	0	1	219.6
83	independent	II	10	F	4.9	Siberian husky	RI	2	5	8	10	1	61
84	independent	II	10	F	4.9	Siberian husky	NR	4	16	17	10	1	85.2
85	independent	IJ	14	M	2.4	basenji	ET	1	9	11	10	3	96.6
86	independent	IJ	14	M	2.4	basenji	ET	3	30	40	1	2	250.6
87	independent	IJ	14	M	2.4	basenji	RI	4	6	9	13	3	61.2
88	independent	IJ	14	M	2.4	basenji	NR	2	15	16	18	0	101.8
89	independent	IK	11	M	7.1	shiba inu	ET	2	30	30	26	21	296.2
90	independent	IK	11	M	7.1	shiba inu	ET	4	30	30	11	8	260.2
91	independent	IK	11	M	7.1	shiba inu	RI	3	30	30	3	6	200.6
92	independent	IK	11	M	7.1	shiba inu	NR	1	30	30	3	3	127.8
93	independent	IL	13	F	8.1	akita inu	ET	2	30	36	1	12	355.8
94	independent	IL	13	F	8.1	akita inu	ET	4	30	32	1	9	243
95	independent	IL	13	F	8.1	akita inu	RI	1	5	17	0	6	76.4
96	independent	IL	13	F	8.1	akita inu	NR	3	8	20	3	7	80.2

## Sheet: Food Tolerance Test
group	subject	dyad	sex	age	breed	condition	order	duration_co-feed
cooperative	CA	1	M	7.3	border collie	ET	1	4
cooperative	CA	1	M	7.3	border collie	ET	3	2.6
cooperative	CA	1	M	7.3	border collie	RI	4	0
cooperative	CC	3	F	3.3	Labrador retriever	ET	1	1
cooperative	CC	3	F	3.3	Labrador retriever	ET	3	0
cooperative	CC	3	F	3.3	Labrador retriever	RI	4	0
cooperative	CD	4	M	3.6	border collie	ET	1	9.2
cooperative	CD	4	M	3.6	border collie	ET	3	0
cooperative	CD	4	M	3.6	border collie	RI	2	0
cooperative	CF	3	F	3.1	Labrador retriever	ET	1	1
cooperative	CF	3	F	3.1	Labrador retriever	ET	3	0
cooperative	CF	3	F	3.1	Labrador retriever	RI	4	0
cooperative	CG	5	M	2	border collie	ET	1	2.2
cooperative	CG	5	M	2	border collie	ET	3	0
cooperative	CG	5	M	2	border collie	RI	2	0
cooperative	CH	6	F	2.3	rough collie	ET	1	0
cooperative	CH	6	F	2.3	rough collie	ET	3	0
cooperative	CH	6	F	2.3	rough collie	RI	2	0
cooperative	CI	5	F	9.8	Australian shepherd	ET	3	0
cooperative	CI	5	F	9.8	Australian shepherd	ET	1	2.2
cooperative	CI	5	F	9.8	Australian shepherd	RI	2	0
cooperative	CJ	1	F	10.9	border collie	ET	1	4
cooperative	CJ	1	F	10.9	border collie	ET	3	2.6
cooperative	CJ	1	F	10.9	border collie	RI	4	1.6
cooperative	CK	6	F	3.3	rough collie	ET	1	0
cooperative	CK	6	F	3.3	rough collie	ET	3	0
cooperative	CK	6	F	3.3	rough collie	RI	2	0.2
cooperative	CL	7	M	3	Australian shepherd	ET	1	0.8
cooperative	CL	7	M	3	Australian shepherd	ET	3	0.4
cooperative	CL	7	M	3	Australian shepherd	RI	4	0
independent	IA	8	F	5.2	shiba inu	ET	1	0
independent	IA	8	F	5.2	shiba inu	ET	3	0
independent	IA	8	F	5.2	shiba inu	RI	4	0
independent	IB	8	F	3.9	shiba inu	ET	1	0
independent	IB	8	F	3.9	shiba inu	ET	3	0
independent	IB	8	F	3.9	shiba inu	RI	4	0
independent	IC	9	M	9.8	Siberian husky	ET	1	2.6
independent	IC	9	M	9.8	Siberian husky	ET	3	1.8
independent	IC	9	M	9.8	Siberian husky	RI	4	0
independent	ID	10	F	5.8	Siberian husky	ET	1	0
independent	ID	10	F	5.8	Siberian husky	ET	3	6.8
independent	ID	10	F	5.8	Siberian husky	RI	2	7.8
independent	IE	11	F	8.2	shiba inu	ET	1	0
independent	IE	11	F	8.2	shiba inu	ET	3	0
independent	IE	11	F	8.2	shiba inu	RI	2	0
independent	IF	12	F	2.8	shiba inu	ET	1	0
independent	IF	12	F	2.8	shiba inu	ET	3	0
independent	IF	12	F	2.8	shiba inu	RI	4	0
independent	IG	9	M	11	Siberian husky	ET	1	2.6
independent	IG	9	M	11	Siberian husky	ET	3	1.8
independent	IG	9	M	11	Siberian husky	RI	4	0
independent	IH	13	F	1.1	akita inu	ET	2	0
independent	IH	13	F	1.1	akita inu	ET	4	0
independent	IH	13	F	1.1	akita inu	RI	1	0
independent	II	10	F	4.9	Siberian husky	ET	1	0
independent	II	10	F	4.9	Siberian husky	ET	3	6.8
independent	II	10	F	4.9	Siberian husky	RI	2	5.2
independent	IJ	14	M	2.4	basenji	ET	1	0
independent	IJ	14	M	2.4	basenji	ET	3	1.2
independent	IJ	14	M	2.4	basenji	RI	4	0
independent	IK	11	M	7.1	shiba inu	ET	2	0
independent	IK	11	M	7.1	shiba inu	ET	4	0
independent	IK	11	M	7.1	shiba inu	RI	3	0
independent	IL	13	F	8.1	akita inu	ET	2	0
independent	IL	13	F	8.1	akita inu	ET	4	0
independent	IL	13	F	8.1	akita inu	RI	1	0

## Sheet: Free Interaction Session
group	subject	dyad	sex	age	breed	condition	order	latency_to_contact_experimenter	duration_proximity_to_partner
cooperative	CA	1	M	7.3	border collie	ET	1	300	296.2
cooperative	CA	1	M	7.3	border collie	ET	3	97.4	28.4
cooperative	CA	1	M	7.3	border collie	RI	4	0	3.4
cooperative	CB	2	M	4.9	Australian shepherd	ET	1	100.8	107.6
cooperative	CB	2	M	4.9	Australian shepherd	ET	3	47	182.4
cooperative	CB	2	M	4.9	Australian shepherd	RI	4	300	105.6
cooperative	CC	3	F	3.3	Labrador retriever	ET	1	3.2	172.2
cooperative	CC	3	F	3.3	Labrador retriever	ET	3	11.2	148.8
cooperative	CC	3	F	3.3	Labrador retriever	RI	4	0.8	94
cooperative	CD	4	M	3.6	border collie	ET	1	40.4	140.8
cooperative	CD	4	M	3.6	border collie	ET	3	240.2	127.6
cooperative	CD	4	M	3.6	border collie	RI	2	300	67.4
cooperative	CE	2	M	1.5	Australian shepherd	ET	1	134.4	107.6
cooperative	CE	2	M	1.5	Australian shepherd	ET	3	3.6	182.4
cooperative	CE	2	M	1.5	Australian shepherd	RI	4	164.2	164
cooperative	CF	3	F	3.1	Labrador retriever	ET	1	13	172.2
cooperative	CF	3	F	3.1	Labrador retriever	ET	3	20.6	148.8
cooperative	CF	3	F	3.1	Labrador retriever	RI	4	21.4	95.8
cooperative	CG	5	M	2	border collie	ET	3	110.8	104.2
cooperative	CG	5	M	2	border collie	ET	1	63.2	41.4
cooperative	CG	5	M	2	border collie	RI	2	300	72.6
cooperative	CH	6	F	2.3	rough collie	ET	1	3.4	151.6
cooperative	CH	6	F	2.3	rough collie	ET	3	2	206.2
cooperative	CH	6	F	2.3	rough collie	RI	2	0	186
cooperative	CI	5	F	9.8	Australian shepherd	ET	3	59	104.2
cooperative	CI	5	F	9.8	Australian shepherd	ET	1	0.4	41.4
cooperative	CI	5	F	9.8	Australian shepherd	RI	2	48.6	64.6
cooperative	CJ	1	F	10.9	border collie	ET	1	300	296.2
cooperative	CJ	1	F	10.9	border collie	ET	3	300	28.4
cooperative	CJ	1	F	10.9	border collie	RI	4	9.8	10.2
cooperative	CK	6	F	3.3	rough collie	ET	1	39.2	151.6
cooperative	CK	6	F	3.3	rough collie	ET	3	192.2	206.2
cooperative	CK	6	F	3.3	rough collie	RI	2	300	147.6
cooperative	CL	7	M	3	Australian shepherd	ET	3	300	34.6
cooperative	CL	7	M	3	Australian shepherd	ET	1	300	78.4
cooperative	CL	7	M	3	Australian shepherd	RI	4	106	110.8
independent	IA	8	F	5.2	shiba inu	ET	1	5.8	99.2
independent	IA	8	F	5.2	shiba inu	ET	3	300	2.2
independent	IA	8	F	5.2	shiba inu	RI	4	300	256.6
independent	IB	8	F	3.9	shiba inu	ET	1	4	99.2
independent	IB	8	F	3.9	shiba inu	ET	3	6	2.2
independent	IB	8	F	3.9	shiba inu	RI	4	300	109
independent	IC	9	M	9.8	Siberian husky	ET	1	33.6	55.4
independent	IC	9	M	9.8	Siberian husky	ET	3	0	104.6
independent	IC	9	M	9.8	Siberian husky	RI	4	57.4	92.8
independent	ID	10	F	5.8	Siberian husky	ET	1	0.6	75.4
independent	ID	10	F	5.8	Siberian husky	ET	3	300	117.2
independent	ID	10	F	5.8	Siberian husky	RI	2	300	3.4
independent	IE	11	F	8.2	shiba inu	ET	1	31.2	95.8
independent	IE	11	F	8.2	shiba inu	ET	3	119.4	67.6
independent	IE	11	F	8.2	shiba inu	RI	2	44.6	43.6
independent	IF	12	F	2.8	shiba inu	ET	1	23.4	35
independent	IF	12	F	2.8	shiba inu	ET	3	300	56.8
independent	IF	12	F	2.8	shiba inu	RI	4	0	38.4
independent	IG	9	M	11	Siberian husky	ET	1	0	55.4
independent	IG	9	M	11	Siberian husky	ET	3	10.8	104.6
independent	IG	9	M	11	Siberian husky	RI	4	207.2	105
independent	IH	13	F	1.1	akita inu	ET	2	3.8	30
independent	IH	13	F	1.1	akita inu	ET	4	134.8	102
independent	IH	13	F	1.1	akita inu	RI	1	31.8	26.6
independent	II	10	F	4.9	Siberian husky	ET	1	1	75.4
independent	II	10	F	4.9	Siberian husky	ET	3	35.2	117.2
independent	II	10	F	4.9	Siberian husky	RI	2	300	22.2
independent	IJ	14	M	2.4	basenji	ET	1	112.8	48.2
independent	IJ	14	M	2.4	basenji	ET	3	300	88.8
independent	IJ	14	M	2.4	basenji	RI	4	47	102
independent	IK	11	M	7.1	shiba inu	ET	2	5	95.8
independent	IK	11	M	7.1	shiba inu	ET	4	13.2	67.6
independent	IK	11	M	7.1	shiba inu	RI	3	40.4	109.8
independent	IL	13	F	8.1	akita inu	ET	2	300	30
independent	IL	13	F	8.1	akita inu	ET	4	102.8	102
independent	IL	13	F	8.1	akita inu	RI	1	14.6	214.8
